# Supplementary material for: Long term visuo-vestibular mismatch in freely behaving mice differentially affects gaze stabilizing reflexes
Source: PubMed Central journal article supplement (PMC7674424; doi:10.1038/s41598-020-77026-w), 2020-11-18
Supplement: 41598_2020_77026_MOESM1_ESM.pdf [file 41598_2020_77026_MOESM1_ESM.pdf]

**Title: Long term visuo-vestibular mismatch in freely behaving mice differentially affects gaze stabilizing reflexes**

Authors: Filipa França de Barros<sup>1\*</sup>, Louise Schenberg<sup>1</sup>, Michele Tagliabue<sup>1</sup>, Mathieu Beraneck<sup>1\*</sup>

Affiliation: <sup>1</sup>Université de Paris, CNRS, Integrative Neuroscience and Cognition Center, F-75006 Paris, France.

\*Corresponding authors:

Filipa França de Barros: CNRS UMR 8002, Université de Paris, 45 rue des St-Pères, Paris 75270, France. E-mail: [filipa.barros@parisdescartes.fr](mailto:filipa.barros@parisdescartes.fr)

Dr. M. Beraneck: CNRS UMR 8002, Université de Paris, 45 rue des St-Pères, Paris 75270, France. E-mail: [mathieu.beraneck@parisdescartes.fr](mailto:mathieu.beraneck@parisdescartes.fr)

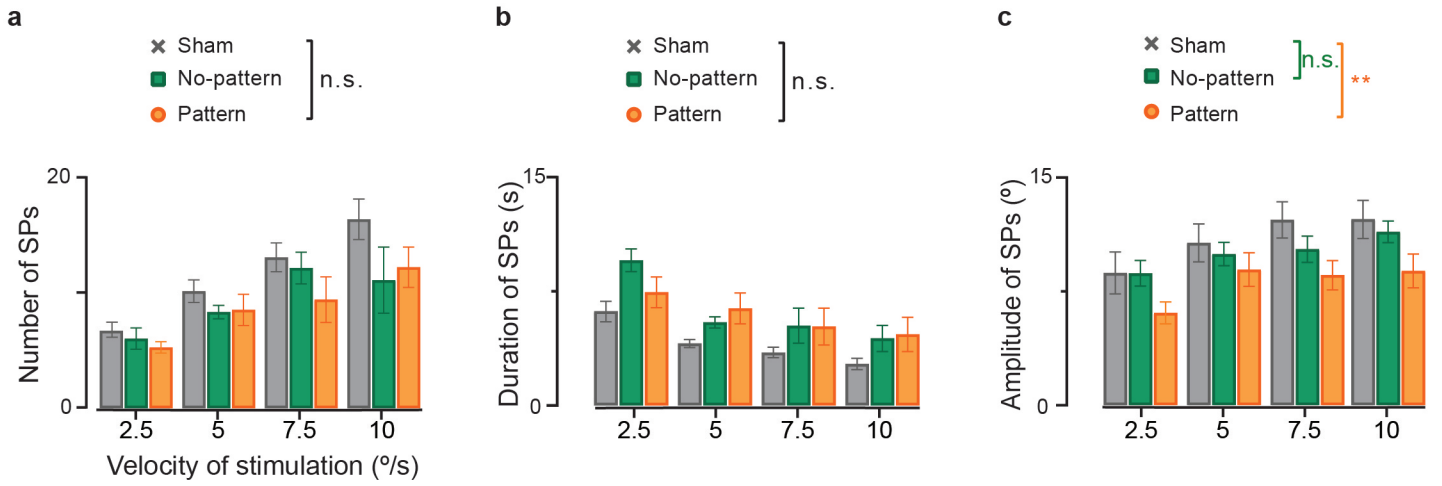

**Supplementary Figure S1.** Features of the optokinetic nystagmus. Quantification of all the slow phases evoked along the constant velocity 60s-long optokinetic stimulation. The (a) number, (b) duration and (c) amplitude describe the slow phases recorded at day 0 at different velocities. Differences between groups are indicated above each graph. Bars represent mean+/-SEM. Newman Keuls post-hoc test \*  $p < 0.05$ ; \*\* $p < 0.01$ ; \*\*\* $p < 10^{-3}$ .
